# Supplementary material for: Optimisation of pyruvate hyperpolarisation using SABRE by tuning the active magnetisation transfer catalyst
Source: PubMed Central journal article supplement (PMC7315823; doi:10.1039/c9cy02498k), 2020-01-28
Supplement: CY-010-C9CY02498K-s001.pdf [file CY-010-C9CY02498K-s001.pdf]

## SUPPORTING INFORMATION

---

Supplementary Material

# **Optimisation of Pyruvate Hyperpolarisation using SABRE by Tuning the Active Magnetisation Transfer Catalyst**

Ben. J. Tickner, Olga Semenova, Wissam Iali, Peter J. Rayner, Adrian C.  
Whitwood and Simon B. Duckett\*

Corresponding Author: [simon.duckett@york.ac.uk](mailto:simon.duckett@york.ac.uk)

## Table of Contents

- S1. Variation of the  $[\text{Ir}(\text{H})_2(\text{IMes})(\eta^2\text{-pyruvate})(\text{L})]$  co-ligand, L**  
S1.1: NMR spectra where L is 4-chlorobenzenemethanethiol  
S1.2: NMR spectra where L is Formaldehyde  
S1.3: NMR spectra where L is Triphenylphosphine  
S1.4: NMR spectra where L is Ethylisothiocyanate  
S1.5: NMR spectra where L is Thiophene  
S1.6: NMR spectra where L is Imidazole  
S1.7: X-ray crystallography of  $[\text{Ir}_2(\text{H})_4(\kappa^2\text{-SCH}_2\text{PhCl})_2(\text{IMes})_2]$   
S1.8: X-ray crystallography of  $[\text{Ir}(\text{H})_3(\text{PPh}_3)_3]$
- S2. Monitoring  $^{13}\text{C}_2$  Pyruvate signal enhancement and 3b concentration over time**  
S2.1: Effect of changing the sulfoxide  
S2.2: Effect of changing the chloride concentration  
S2.3: Effect of changing the carbene ligand
- S3. Hyperpolarised  $^{13}\text{C}$  and  $^1\text{H}$  NMR spectra**  
S3.1: Typical hyperpolarised  $^{13}\text{C}$  and  $^1\text{H}$  NMR spectra  
S3.2: Hyperpolarised  $^{13}\text{C}$  and  $^1\text{H}$  spectra using sulfoxide IX  
S3.3: Hyperpolarised  $^{13}\text{C}$  and  $^1\text{H}$  spectra using sulfoxide X
- S4. Optimisation of  $^{13}\text{C}_2$  Pyruvate signal enhancement**  
S4.1: Effect of shaking time and *p*-H<sub>2</sub> pressure  
S4.2: Effect of pyruvate concentration
- S5. References**

## S1. Variation of the $[\text{Ir}(\text{H})_2(\text{IMes})(\eta^2\text{-pyruvate})(\text{L})]$ co-ligand, L

Samples were prepared containing  $[\text{IrCl}(\text{COD})(\text{IMes})]$  (5 mM) (where IMes = 1,3-bis(2,4,6-trimethyl-phenyl)imidazol-2-ylidene and COD = *cis,cis*-1,5-cyclooctadiene) with 6 equivalents of sodium pyruvate-1,2- $^{13}\text{C}_2$  and 4 equivalents of the specified co-ligand (L) in 0.6 mL of methanol- $d_4$  unless otherwise stated in a 5 mm NMR tube that was fitted with a J. Young's tap. The co-ligands used in this study are 4-chlorobenzenemethanethiol, formaldehyde, triphenylphosphine, ethylisothiocyanate, thiophene, imidazole, dimethylsulfoxide (DMSO) (I), phenylmethylsulfoxide (II), chlorophenylmethylsulfoxide (III), vinylsulfoxide (IV), diphenylsulfoxide (V), dibenzylsulfoxide (VI), dibutylsulfoxide (VII), tetramethylene sulfoxide (VIII), methionine sulfoxide (IX) and Fmoc-L-methionine sulfoxide (X) which were all purchased from Sigma Aldrich and used without further purification. Unless otherwise stated, the iridium catalyst used was  $[\text{IrCl}(\text{COD})(\text{IMes})]$ . The iridium precatalysts used in this work were synthesized in our laboratory according to literature procedures.<sup>1</sup> The solutions were subsequently degassed by two freeze-pump-thaw cycles before 3 bar  $\text{H}_2$  was added. These samples were then analysed by SABRE-NMR methods. Typical NMR spectra are shown in Figures S1-S24. Some of the data (Figure S9-S20) uses sodium pyruvate-1- $^{13}\text{C}$  as the reagent due to lower reagent cost.

### S1.1: NMR spectra where L is 4-chlorobenzenemethanethiol

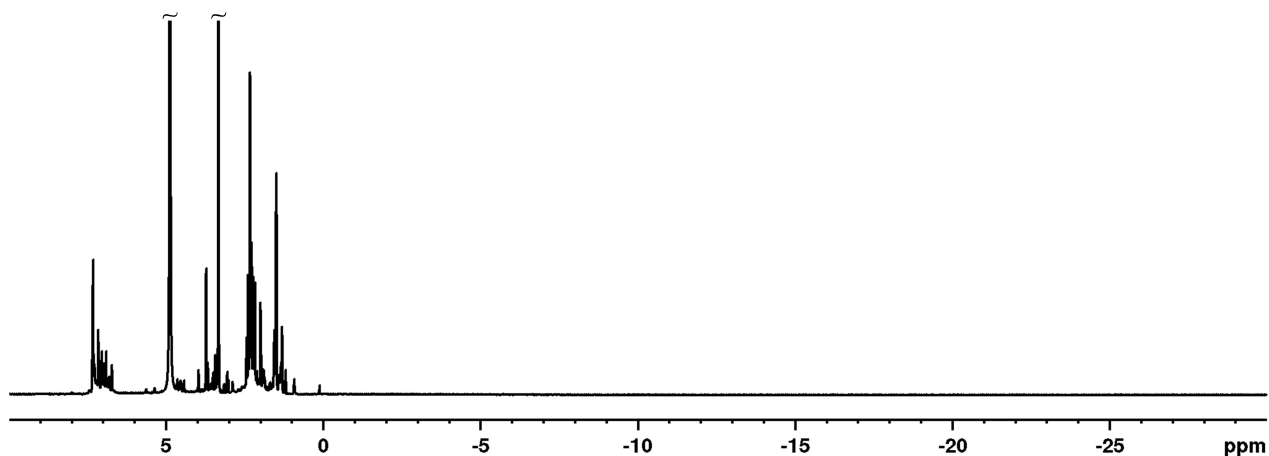

Figure S1: Thermal 64 scan  $^1\text{H}$  NMR spectrum recorded at 298 K of a sample of  $[\text{IrCl}(\text{COD})(\text{IMes})]$ , sodium pyruvate-1,2- $^{13}\text{C}_2$  and 4-chlorobenzenemethanethiol in methanol- $d_4$ , after leaving for 60 mins in a water bath at 45 °C following the addition of 3 bar  $\text{H}_2$

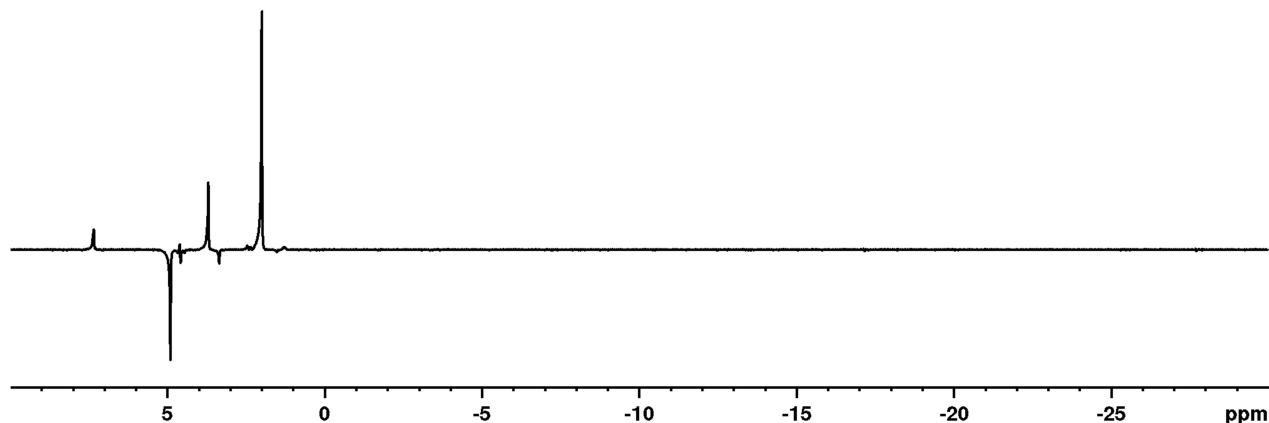

## SUPPORTING INFORMATION

Figure S2: Hyperpolarised 1 scan  $^1\text{H}$  NMR spectrum recorded at 298 K resulting from shaking a sample of  $[\text{IrCl}(\text{COD})(\text{IMes})]$ , sodium pyruvate-1,2- $^{13}\text{C}_2$  and 4-chlorobenzenemethanethiol in methanol- $d_4$  with 3 bar  $p\text{-H}_2$  for 10 seconds at 65 G.

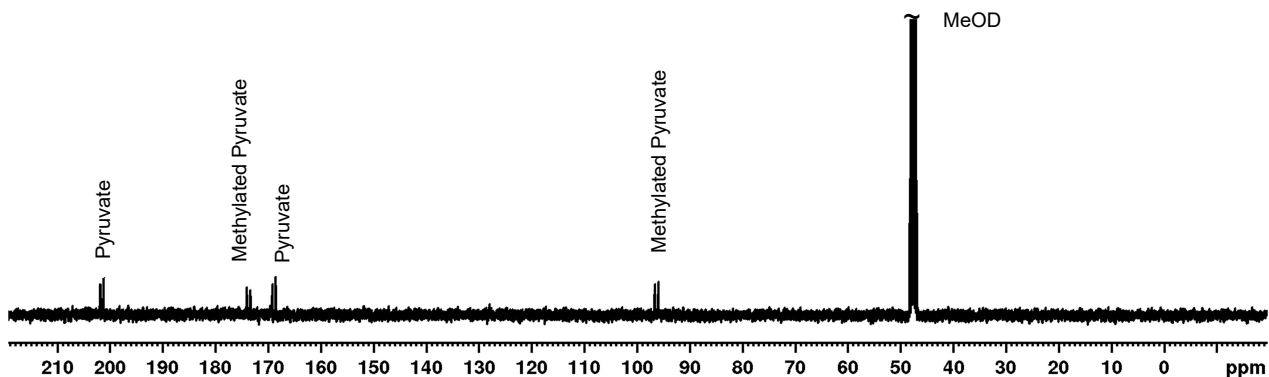

Figure S3: Thermal 128 scan  $^{13}\text{C}$  NMR spectrum recorded at 298 K of a sample of  $[\text{IrCl}(\text{COD})(\text{IMes})]$ , sodium pyruvate-1,2- $^{13}\text{C}_2$  and 4-chlorobenzenemethanethiol in methanol- $d_4$  after leaving the sample for 60 mins in a water bath at 45 °C following the addition of 3 bar  $\text{H}_2$

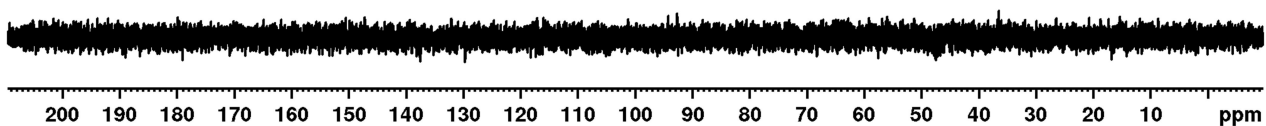

Figure S4: Hyperpolarised 1 scan  $^{13}\text{C}$  NMR spectrum at 298 K recorded immediately after shaking a sample of  $[\text{IrCl}(\text{COD})(\text{IMes})]$ , sodium pyruvate-1,2- $^{13}\text{C}_2$  and 4-chlorobenzenemethanethiol in methanol- $d_4$  with 3 bar  $p\text{-H}_2$  for 10 seconds in a mu metal shield.

### S1.2: NMR spectra where L is Formaldehyde

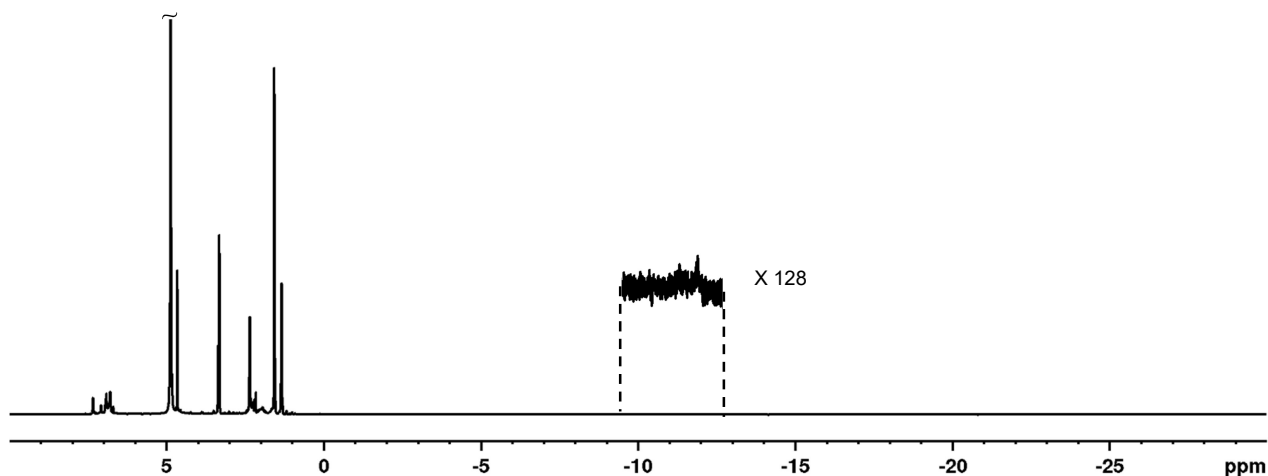

Figure S5: Thermal 32 scan  $^1\text{H}$  NMR spectrum recorded at 298 K of a sample of  $[\text{IrCl}(\text{COD})(\text{IMes})]$ , sodium pyruvate-1,2- $^{13}\text{C}_2$  and formaldehyde in methanol- $d_4$  after leaving the sample for 60 mins in a water bath at 45 °C following the addition of 3 bar  $\text{H}_2$ .



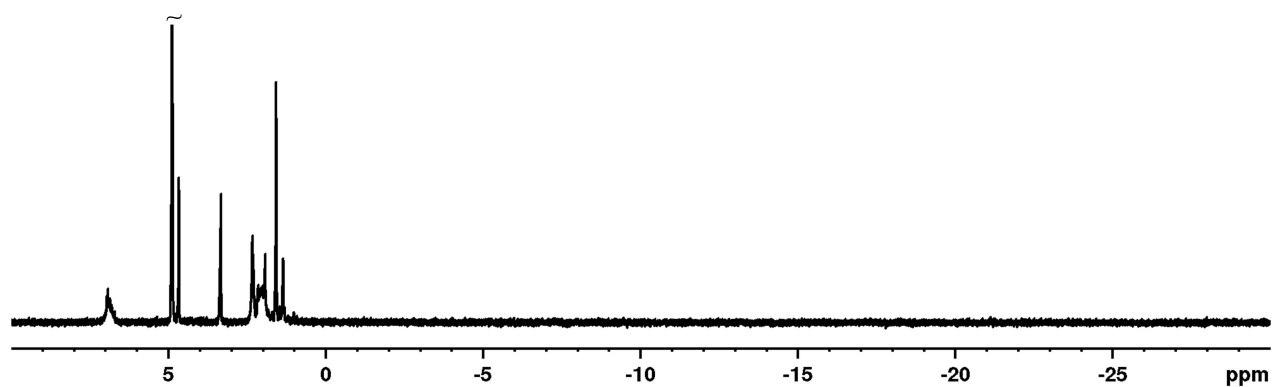

Figure S6: Hyperpolarised 1 scan  $^1\text{H}$  NMR spectrum recorded at 298 K resulting from shaking a sample of  $[\text{IrCl}(\text{COD})(\text{IMes})]$ , sodium pyruvate-1,2- $^{13}\text{C}_2$  and formaldehyde in methanol- $d_4$  with 3 bar  $p\text{-H}_2$  for 10 seconds at 65 G.

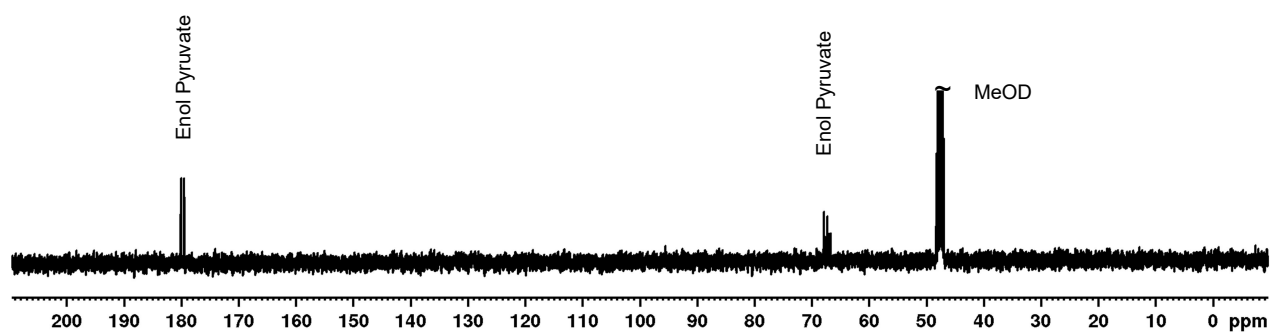

Figure S7: Thermal 64 scan  $^{13}\text{C}$  NMR spectrum recorded at 298 K of a sample of  $[\text{IrCl}(\text{COD})(\text{IMes})]$ , sodium pyruvate-1,2- $^{13}\text{C}_2$  and formaldehyde in methanol- $d_4$  after leaving the sample for 60 mins in a water bath at 45  $^\circ\text{C}$  following the addition of 3 bar  $\text{H}_2$ .

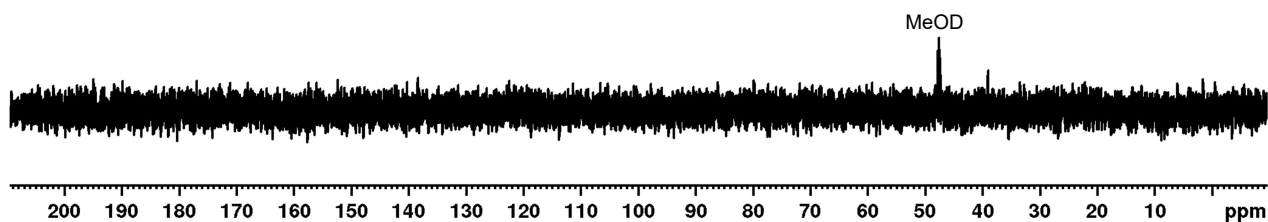

Figure S8: Hyperpolarised 1 scan  $^{13}\text{C}$  NMR spectrum at 298 K recorded immediately after shaking a sample of  $[\text{IrCl}(\text{COD})(\text{IMes})]$ , sodium pyruvate-1,2- $^{13}\text{C}_2$  and formaldehyde in methanol- $d_4$  with 3 bar  $p\text{-H}_2$  for 10 seconds in a mu metal shield.

## S1.3: NMR spectra where L is Triphenylphosphine

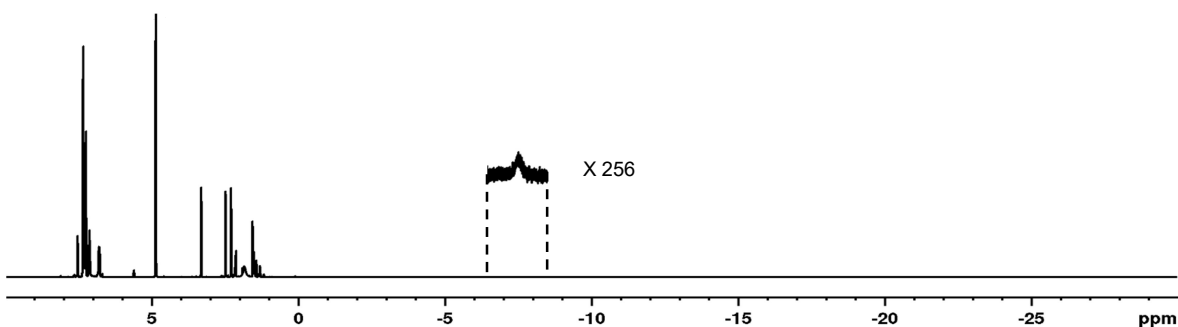

Figure S9: Thermal 32 scan  $^1\text{H}$  NMR spectrum recorded at 298 K of a sample of  $[\text{IrCl}(\text{COD})(\text{IMes})]$ , sodium pyruvate-1- $^{13}\text{C}_1$  and triphenylphosphine in methanol- $d_4$  recorded after leaving the sample for 60 mins in a water bath at 45 °C following the addition of 3 bar  $\text{H}_2$ .

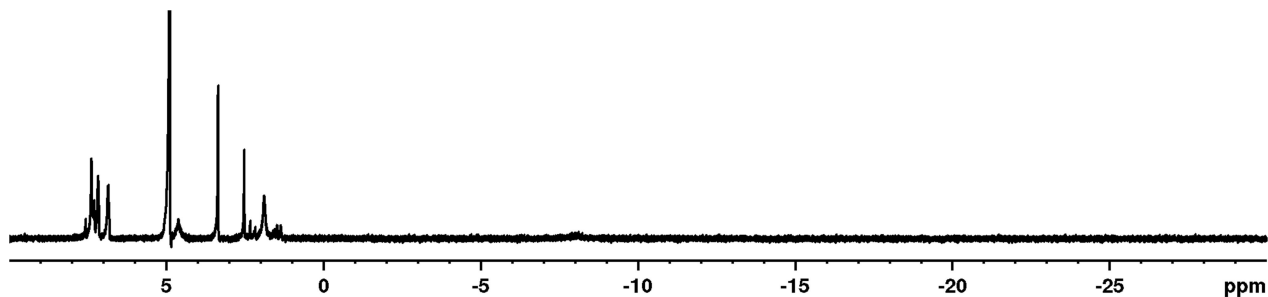

Figure S10: Hyperpolarised 1 scan  $^1\text{H}$  NMR spectrum recorded at 298 K resulting from shaking a sample of  $[\text{IrCl}(\text{COD})(\text{IMes})]$ , sodium pyruvate-1- $^{13}\text{C}_1$  and triphenylphosphine in methanol- $d_4$  with 3 bar  $p\text{-H}_2$  for 10 seconds at 65 G.

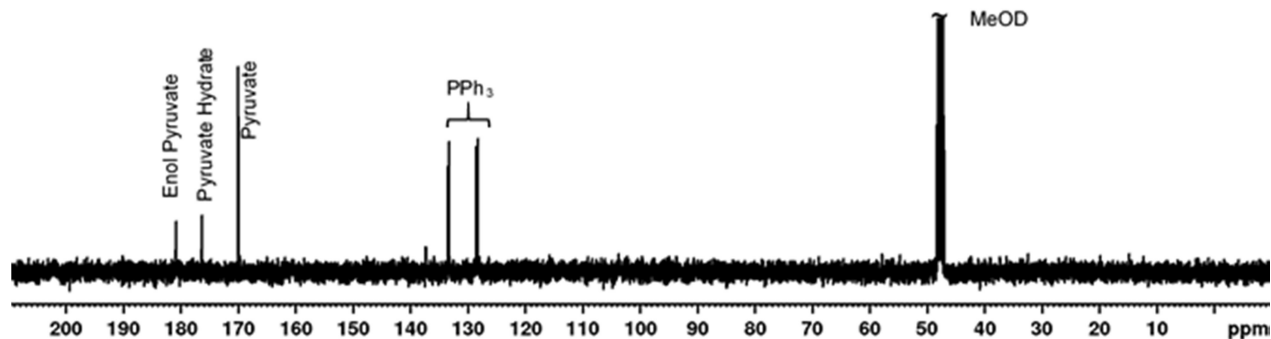

Figure S11: Thermal 64 scan  $^{13}\text{C}$  NMR spectrum recorded at 298 K of a sample of  $[\text{IrCl}(\text{COD})(\text{IMes})]$ , sodium pyruvate-1- $^{13}\text{C}_1$  and triphenylphosphine in methanol- $d_4$  after leaving the sample for 60 mins in a water bath at 45 °C following the addition of 3 bar  $\text{H}_2$ .

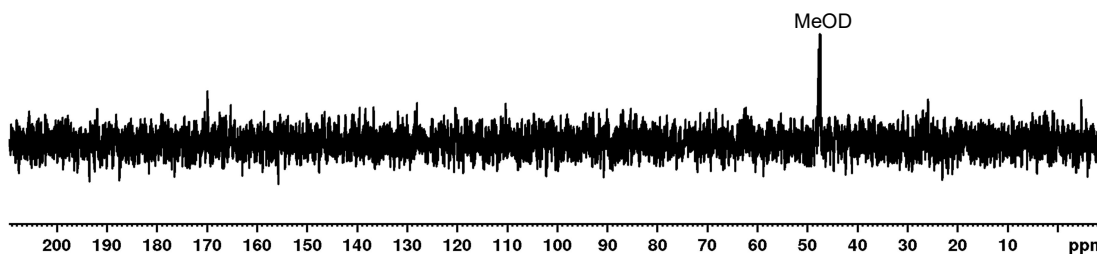

Figure S12: Hyperpolarised 1 scan  $^{13}\text{C}$  NMR spectrum recorded at 298 K resulting from shaking a sample of  $[\text{IrCl}(\text{COD})(\text{IMes})]$ , sodium pyruvate-1- $^{13}\text{C}_1$  and triphenylphosphine in methanol- $d_4$  with 3 bar  $p\text{-H}_2$  for 10 seconds in a mu metal shield.

## S1.4: NMR spectra where L is Ethylisothiocyanate

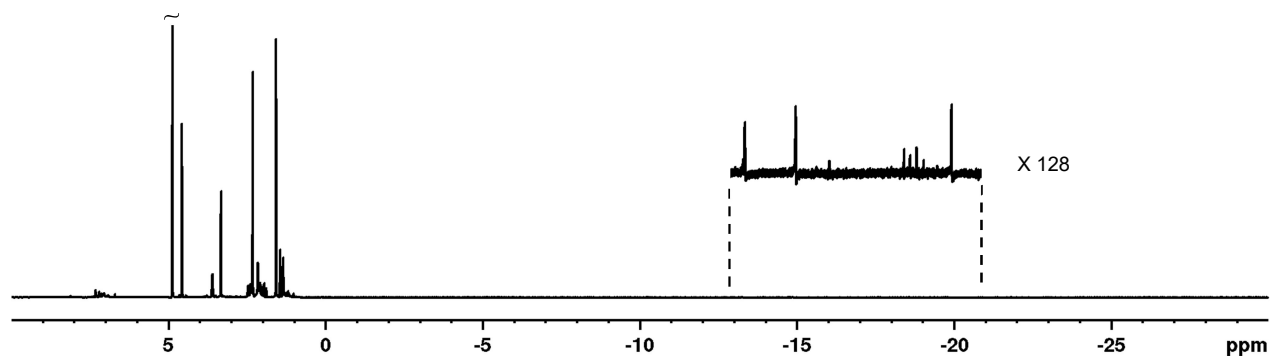

Figure S13: Thermal 64 scan  $^1\text{H}$  NMR spectrum recorded at 298 K of a sample of  $[\text{IrCl}(\text{COD})(\text{IMes})]$ , sodium pyruvate-1- $^{13}\text{C}_1$  and ethylisothiocyanate in methanol- $d_4$  after leaving the sample for 60 mins in a water bath at 45 °C following the addition of 3 bar  $\text{H}_2$ .

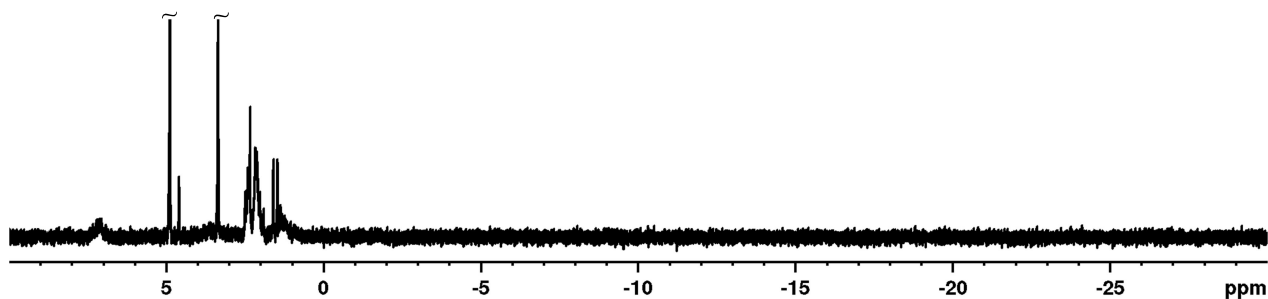

Figure S14: Hyperpolarised 1 scan  $^1\text{H}$  NMR spectrum recorded at 298 K resulting from shaking a sample of  $[\text{IrCl}(\text{COD})(\text{IMes})]$ , sodium pyruvate-1- $^{13}\text{C}_1$  and ethylisothiocyanate in methanol- $d_4$  with 3 bar  $p\text{-H}_2$  for 10 seconds at 65 G.

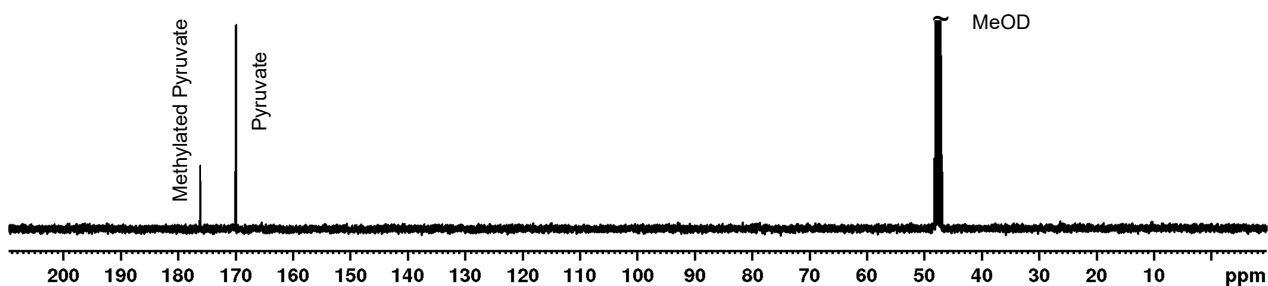

Figure S15: Thermal 64 scan  $^{13}\text{C}$  NMR spectrum recorded at 298 K of a sample of  $[\text{IrCl}(\text{COD})(\text{IMes})]$ , sodium pyruvate-1- $^{13}\text{C}_1$  and ethylisothiocyanate in methanol- $d_4$  after leaving the sample for 60 mins in a water bath at 45 °C following the addition of 3 bar  $\text{H}_2$ .

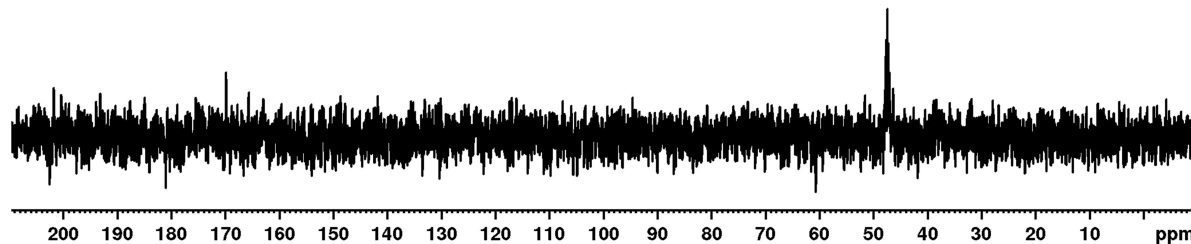

Figure S16: Hyperpolarised 1 scan  $^{13}\text{C}$  NMR spectrum recorded at 298 K resulting from shaking a sample of  $[\text{IrCl}(\text{COD})(\text{IMes})]$ , sodium pyruvate-1- $^{13}\text{C}_1$  and ethylisothiocyanate in methanol- $d_4$  with 3 bar  $p\text{-H}_2$  for 10 seconds in a mu metal shield.

## S1.5: NMR spectra where L is thiophene

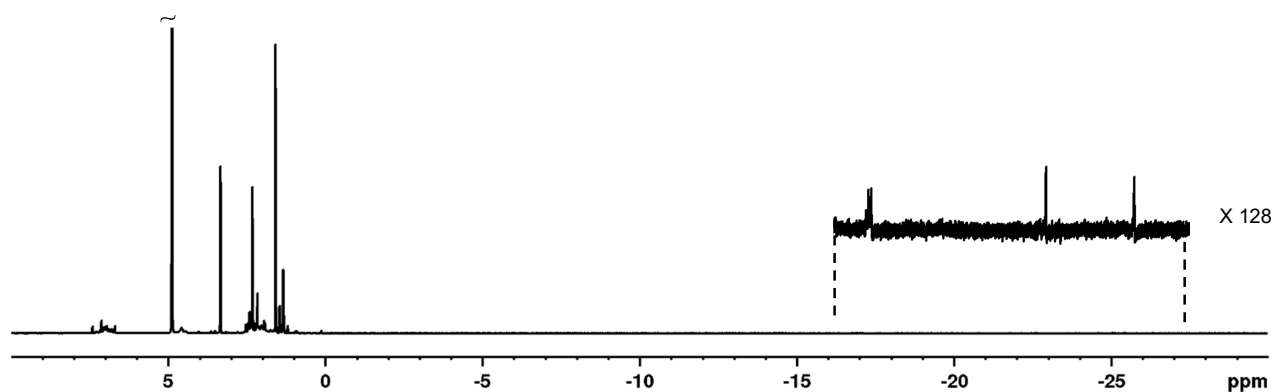

Figure S17: Thermal 64 scan  $^1\text{H}$  NMR spectrum recorded at 298 K of a sample of  $[\text{IrCl}(\text{COD})(\text{IMes})]$ , sodium pyruvate-1- $^{13}\text{C}_1$  and thiophene in methanol- $d_4$  after leaving the sample for 60 mins in a water bath at 45  $^\circ\text{C}$  following the addition of 3 bar  $\text{H}_2$ .

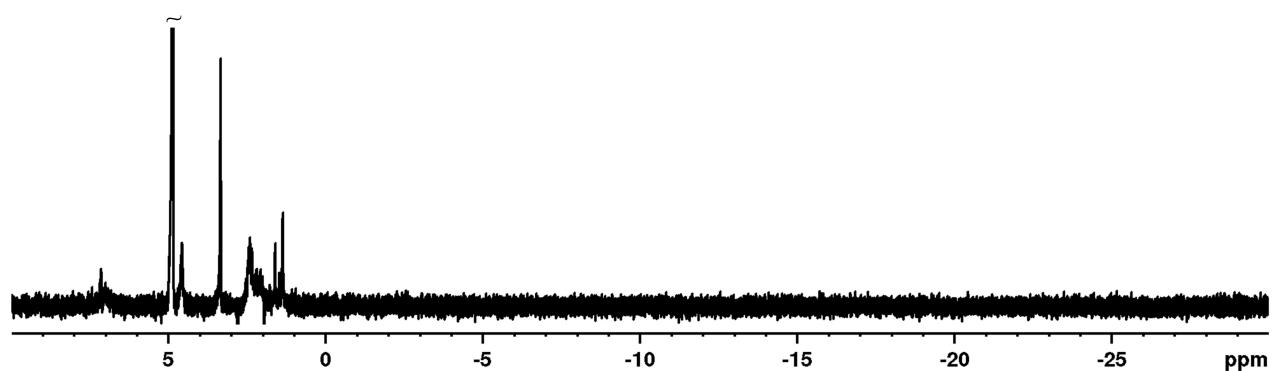

Figure S18: Hyperpolarised 1 scan  $^1\text{H}$  NMR spectrum recorded at 298 K resulting from shaking a sample of  $[\text{IrCl}(\text{COD})(\text{IMes})]$ , sodium pyruvate-1- $^{13}\text{C}_1$  and thiophene in methanol- $d_4$  with 3 bar  $p\text{-H}_2$  for 10 seconds at 65 G.

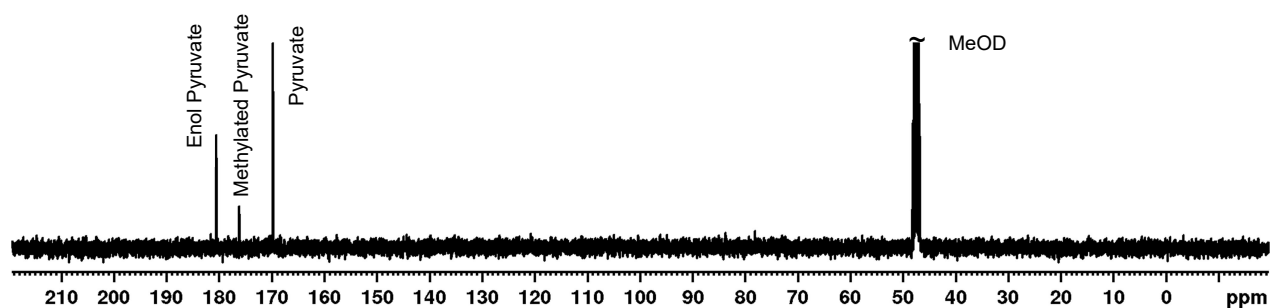

Figure S19: Thermal 64 scan  $^{13}\text{C}$  NMR spectrum recorded at 298 K of a sample of  $[\text{IrCl}(\text{COD})(\text{IMes})]$ , sodium pyruvate-1- $^{13}\text{C}_1$  and thiophene in methanol- $d_4$  after leaving the sample for 60 mins in a water bath at 45  $^\circ\text{C}$  following the addition of 3 bar  $\text{H}_2$ .

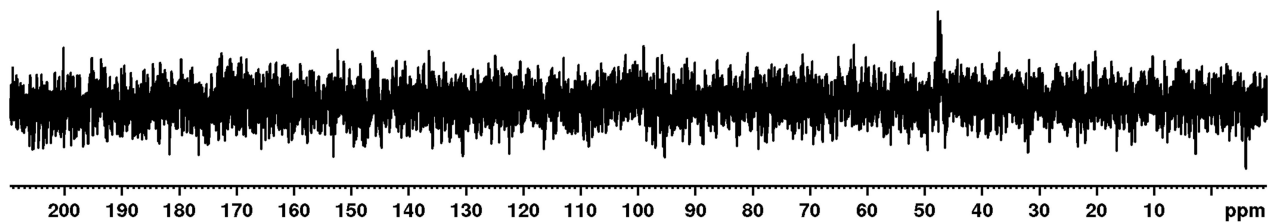

Figure S20: Hyperpolarised 1 scan  $^{13}\text{C}$  NMR spectrum recorded at 298 K resulting from shaking a sample of  $[\text{IrCl}(\text{COD})(\text{IMes})]$ , sodium pyruvate-1- $^{13}\text{C}_1$  and thiophene in methanol- $d_4$  with 3 bar  $p\text{-H}_2$  for 10 seconds in a mu metal shield.

### S1.6: NMR spectra where L is imidazole

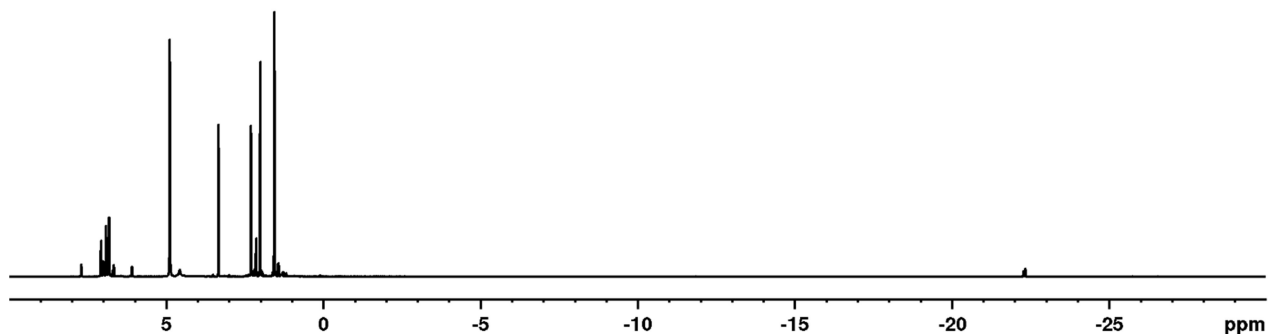

Figure S21: Thermal 64 scan  $^1\text{H}$  NMR spectrum recorded at 298 K of a sample of  $[\text{IrCl}(\text{COD})(\text{IMes})]$ , sodium pyruvate-1,2- $^{13}\text{C}_2$  and imidazole in methanol- $d_4$  after leaving the sample for 120 mins in a water bath at 45 °C following the addition of 3 bar  $\text{H}_2$ .

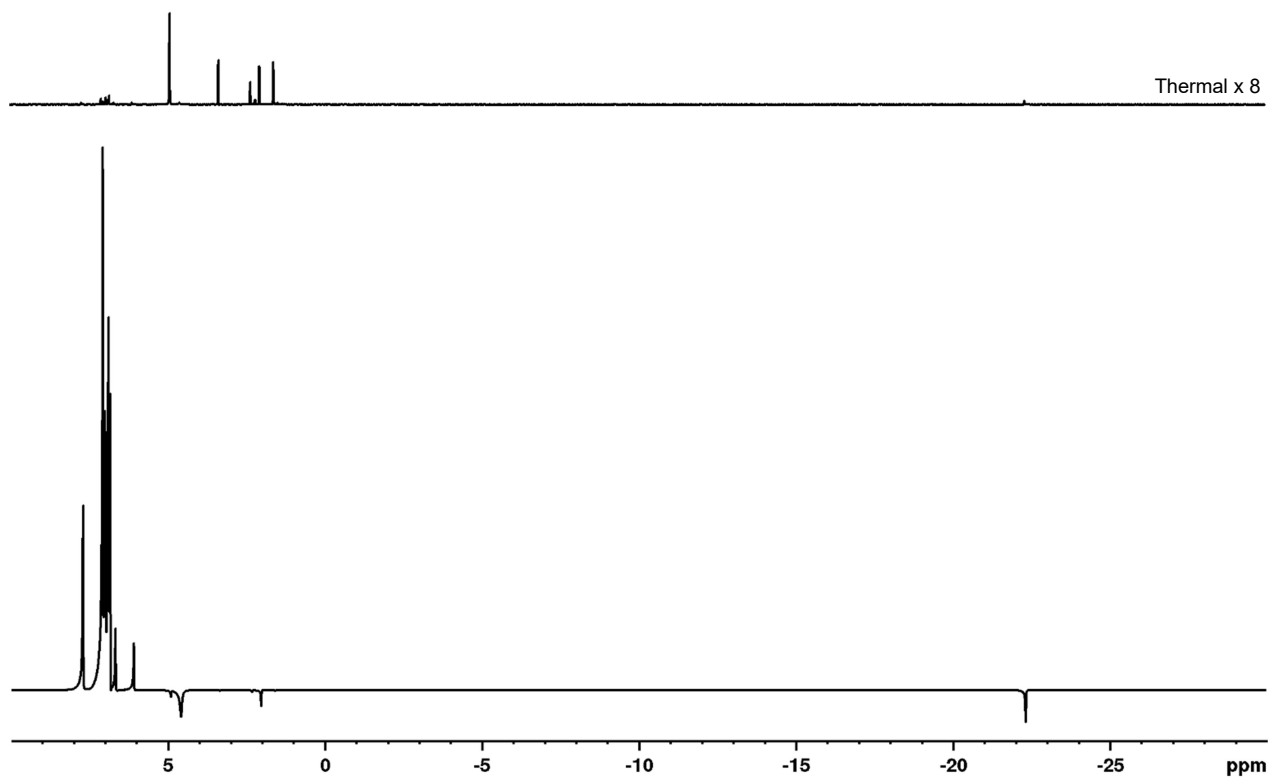

Figure S22: Hyperpolarised 1 scan  $^1\text{H}$  NMR spectrum recorded at 298 K resulting from shaking a sample of  $[\text{IrCl}(\text{COD})(\text{IMes})]$ , sodium pyruvate-1,2- $^{13}\text{C}_2$  and imidazole in methanol- $d_4$  with 3 bar  $p\text{-H}_2$  for 10 seconds at 65 G with corresponding thermal reference trace directly above.

## SUPPORTING INFORMATION

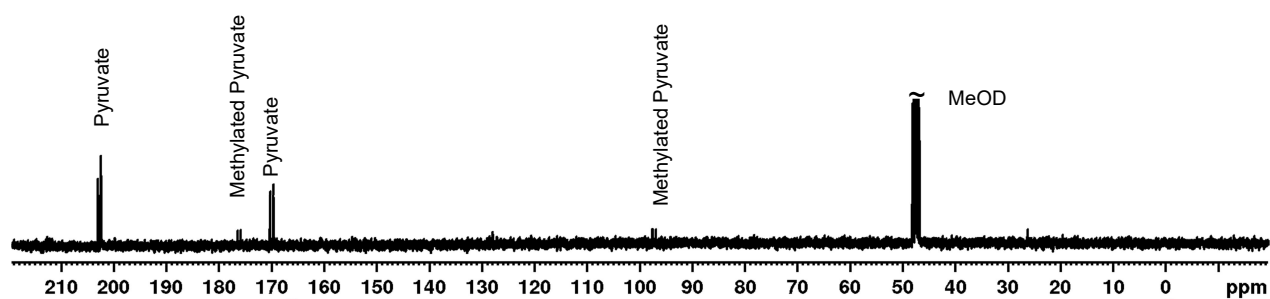

Figure S23: Thermal 128 scan  $^{13}\text{C}$  NMR spectrum recorded at 298 K of a sample of  $[\text{IrCl}(\text{COD})(\text{IMes})]$ , sodium pyruvate-1,2- $^{13}\text{C}_2$  and imidazole in methanol- $d_4$  after leaving the sample for 120 mins in a water bath at 45 °C following the addition of 3 bar  $\text{H}_2$ .

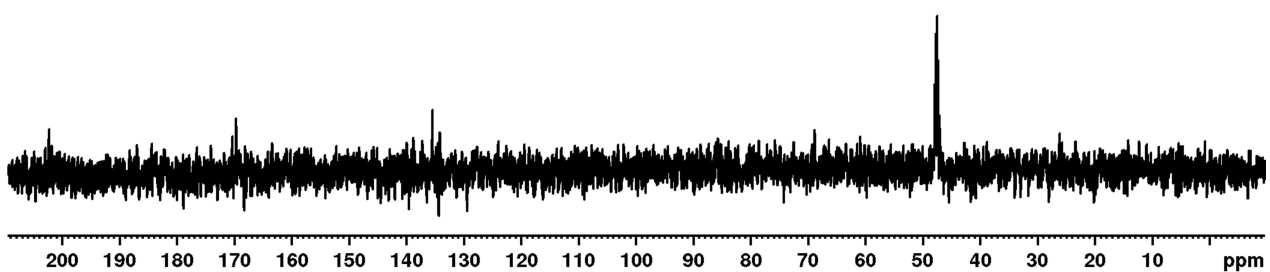

Figure S24: Hyperpolarised 1 scan  $^{13}\text{C}$  NMR spectrum recorded at 298 K resulting from shaking a sample of  $[\text{IrCl}(\text{COD})(\text{IMes})]$ , sodium pyruvate-1,2- $^{13}\text{C}_2$  and imidazole in methanol- $d_4$  with 3 bar  $p\text{-H}_2$  for 10 seconds in a mu metal shield.

### S1.7: X-ray crystallography of $[\text{Ir}_2(\text{H})_4(\kappa^2\text{-SCH}_2\text{PhCl})_2(\text{IMes})_2]$

Crystals were grown by leaving a sample containing 2 mg  $[\text{IrCl}(\text{COD})(\text{IMes})]$  (where IMes = 1,3-bis(2,4,6-trimethylphenyl)imidazol-2-ylidene and COD = *cis,cis*-1,5-cyclooctadiene) with 6 equivalents of sodium pyruvate-1,2- $^{13}\text{C}_2$  and 4 equivalents of 4-chlorobenzenemethanethiol in 0.6 mL of methanol- $d_4$  with 3 bar  $\text{H}_2$  at 278 K for a period of several months. A suitable crystal was selected and mounted on an Oxford Diffraction SuperNova X-ray diffractometer. The crystal was kept at 110 K during data collection. Diffractometer control, data collection, initial unit cell determination, frame integration and unit-cell refinement was carried out with "CrysAlisPro".<sup>2</sup> Face-indexed absorption corrections were applied using spherical harmonics, implemented in SCALE3 ABSPACK scaling algorithm. Using Olex2,<sup>3</sup> the structure was solved with the ShelXT<sup>4</sup> structure solution program using Intrinsic Phasing and refined with the ShelXL<sup>5</sup> refinement package using Least Squares minimisation. X-ray crystal structures were deposited with the CCDC (deposition number 1957542-1957543)

The crystal of  $[\text{Ir}_2(\text{H})_4(\kappa^2\text{-SCH}_2\text{PhCl})_2(\text{IMes})_2]$  showed evidence of minor twinning with two residual density peaks close to the iridium atoms. This could not be resolved using either merohedral or non-merohedral twinning methods. One of the 4-chlorobenzyl groups was disordered and modelled in two positions with refined occupancies of 0.803:0.197(10). Pairs of disordered carbons were constrained to have the same ADP (e.g. C43, & C43a, C44 & C44a etc.). The S-CH<sub>2</sub> bond-lengths were restrained to be equal as were the CH<sub>2</sub>-C(ipso) bond-lengths and the C-Cl bond-lengths. The phenyl ring of the minor form was constrained to be a regular hexagon with a C-C bond length of 1.39 angstroms. For the minor form the CH<sub>2</sub>-C(ortho) distances were restrained to be equal as were the C(meta)-Cl distances. The hydrides were initially located by difference map, the Ir-H bond-length was then adjusted to be 1.65 angstroms and then the location fixed to ride on the iridium.

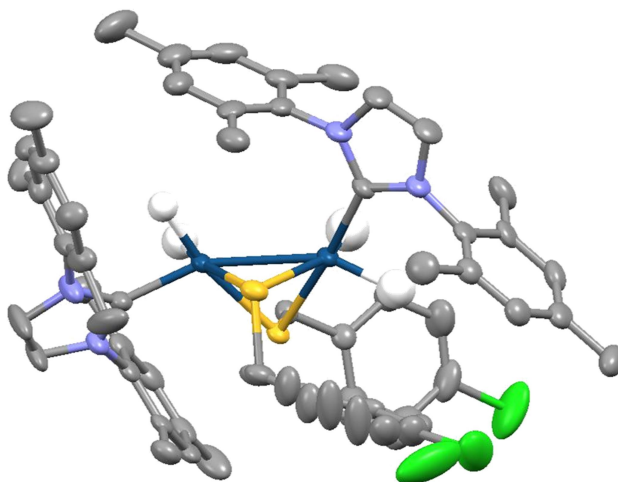

**Figure S25:** Structure of  $[\text{Ir}_2(\text{H})_4(\kappa^2\text{-SCH}_2\text{PhCl})_2(\text{IMes})_2]$  determined by X-ray diffraction studies. Note that all non hydride hydrogen atoms and solvent of crystallisation have been omitted for clarity

**Table S1:** Crystal data and structure refinement for  $[\text{Ir}_2(\text{H})_4(\kappa^2\text{-SCH}_2\text{PhCl})_2(\text{IMes})_2]$

|                       |                                                                         |
|-----------------------|-------------------------------------------------------------------------|
| Empirical formula     | $\text{C}_{57}\text{H}_{68}\text{Cl}_2\text{Ir}_2\text{N}_4\text{OS}_2$ |
| Formula weight        | 1344.57                                                                 |
| Temperature/K         | 110.00(10)                                                              |
| Crystal system        | monoclinic                                                              |
| Space group           | $P2_1/c$                                                                |
| a/Å                   | 12.9317(2)                                                              |
| b/Å                   | 16.6000(3)                                                              |
| c/Å                   | 25.5365(4)                                                              |
| $\alpha^\circ$        | 90                                                                      |
| $\beta^\circ$         | 90.2757(13)                                                             |
| $\gamma^\circ$        | 90                                                                      |
| Volume/Å <sup>3</sup> | 5481.76(15)                                                             |
| Z                     | 4                                                                       |

|                                                |                                                                  |
|------------------------------------------------|------------------------------------------------------------------|
| $\rho_{\text{calc}}/\text{cm}^3$               | 1.629                                                            |
| $\mu/\text{mm}^{-1}$                           | 11.192                                                           |
| F(000)                                         | 2664.0                                                           |
| Crystal size/ $\text{mm}^3$                    | 0.149 × 0.09 × 0.078                                             |
| Radiation                                      | CuK $\alpha$ ( $\lambda = 1.54184$ )                             |
| 2 $\theta$ range for data collection/ $^\circ$ | 6.924 to 134.152                                                 |
| Index ranges                                   | -15 ≤ h ≤ 14, -19 ≤ k ≤ 18, -29 ≤ l ≤ 30                         |
| Reflections collected                          | 20688                                                            |
| Independent reflections                        | 9782 [ $R_{\text{int}} = 0.0256$ , $R_{\text{sigma}} = 0.0331$ ] |
| Data/restraints/parameters                     | 9782/4/650                                                       |
| Goodness-of-fit on $F^2$                       | 1.036                                                            |
| Final R indexes [ $I \geq 2\sigma(I)$ ]        | $R_1 = 0.0299$ , $wR_2 = 0.0678$                                 |
| Final R indexes [all data]                     | $R_1 = 0.0357$ , $wR_2 = 0.0712$                                 |
| Largest diff. peak/hole / $e \text{ \AA}^{-3}$ | 1.92/-1.36                                                       |

### S1.8: X-ray crystallography of $[\text{Ir}(\text{H})_3(\text{PPh}_3)_3]$

Crystals were grown by leaving a sample containing 2 mg  $[\text{IrCl}(\text{COD})(\text{IMes})]$  (where IMes = 1,3-bis(2,4,6-trimethylphenyl)imidazole-2-ylidene and COD = *cis,cis*-1,5-cyclooctadiene) with 6 equivalents of sodium pyruvate-1,2- $^{13}\text{C}_2$  and 4 equivalents of triphenylphosphine in 0.6 mL of methanol- $d_4$  with 3 bar  $\text{H}_2$  at 278 K for a period of several months. A suitable crystal was selected and X-ray diffraction data was collected and solved as described in Section S1.7. The asymmetric unit contained a partial methanol whose occupancy refined to 0.283(5).

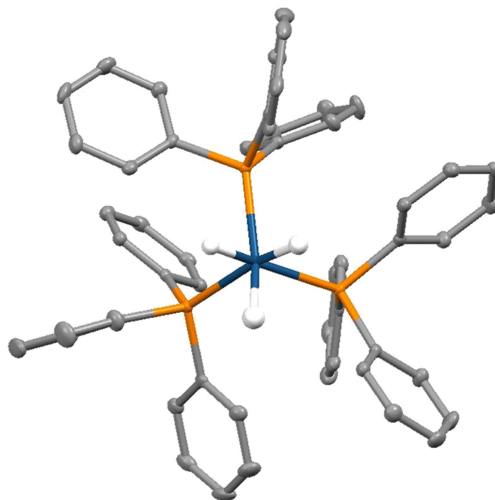

**Figure S26:** Structure of  $[\text{Ir}(\text{H})_3(\text{PPh}_3)_3]$  determined by X-ray diffraction studies. Note that all non hydride hydrogen atoms and solvent of crystallisation have been omitted for clarity

**Table S2:** Crystal data and structure refinement for  $[\text{Ir}(\text{H})_3(\text{PPh}_3)_3]$

|                   |                                                               |
|-------------------|---------------------------------------------------------------|
| Empirical formula | $\text{C}_{54.28}\text{H}_{49.13}\text{IrO}_{0.28}\text{P}_3$ |
| Formula weight    | 991.09                                                        |
| Temperature/K     | 110.00(10)                                                    |
| Crystal system    | monoclinic                                                    |
| Space group       | $P2_1/c$                                                      |
| a/ $\text{Å}$     | 17.31801(12)                                                  |
| b/ $\text{Å}$     | 12.99024(10)                                                  |
| c/ $\text{Å}$     | 19.71788(16)                                                  |
| $\alpha/^\circ$   | 90                                                            |
| $\beta/^\circ$    | 94.4442(7)                                                    |



## SUPPORTING INFORMATION

---

|                                                |                                                                    |
|------------------------------------------------|--------------------------------------------------------------------|
| $\gamma/^\circ$                                | 90                                                                 |
| Volume/ $\text{\AA}^3$                         | 4422.50(6)                                                         |
| Z                                              | 4                                                                  |
| $\rho_{\text{calc}}/\text{g/cm}^3$             | 1.489                                                              |
| $\mu/\text{mm}^{-1}$                           | 7.149                                                              |
| F(000)                                         | 1996.4                                                             |
| Crystal size/ $\text{mm}^3$                    | $0.197 \times 0.099 \times 0.037$                                  |
| Radiation                                      | CuK $\alpha$ ( $\lambda = 1.54184$ )                               |
| 2 $\theta$ range for data collection/ $^\circ$ | 8.158 to 134.152                                                   |
| Index ranges                                   | $-15 \leq h \leq 20$ , $-15 \leq k \leq 15$ , $-23 \leq l \leq 21$ |
| Reflections collected                          | 17542                                                              |
| Independent reflections                        | 7896 [ $R_{\text{int}} = 0.0226$ , $R_{\text{sigma}} = 0.0296$ ]   |
| Data/restraints/parameters                     | 7896/0/557                                                         |
| Goodness-of-fit on $F^2$                       | 1.047                                                              |
| Final R indexes [ $I \geq 2\sigma(I)$ ]        | $R_1 = 0.0199$ , $wR_2 = 0.0458$                                   |
| Final R indexes [all data]                     | $R_1 = 0.0237$ , $wR_2 = 0.0480$                                   |
| Largest diff. peak/hole / $e \text{\AA}^{-3}$  | 0.71/-0.53                                                         |

## S2. Monitoring $^{13}\text{C}_2$ Pyruvate signal enhancement over time

### S2.1: Effect of changing the sulfoxide identity

Dimethylsulfoxide (DMSO) (I), phenylmethylsulfoxide (II), chlorophenylmethylsulfoxide (III), vinylsulfoxide (IV), diphenylsulfoxide (V), dibenzylsulfoxide (VI), dibutylsulfoxide (VII), tetramethylene sulfoxide (VIII), methionine sulfoxide (IX) and Fmoc-L-methionine sulfoxide (X) were used in this work. Their structures are given in Figure 2 of the main manuscript.

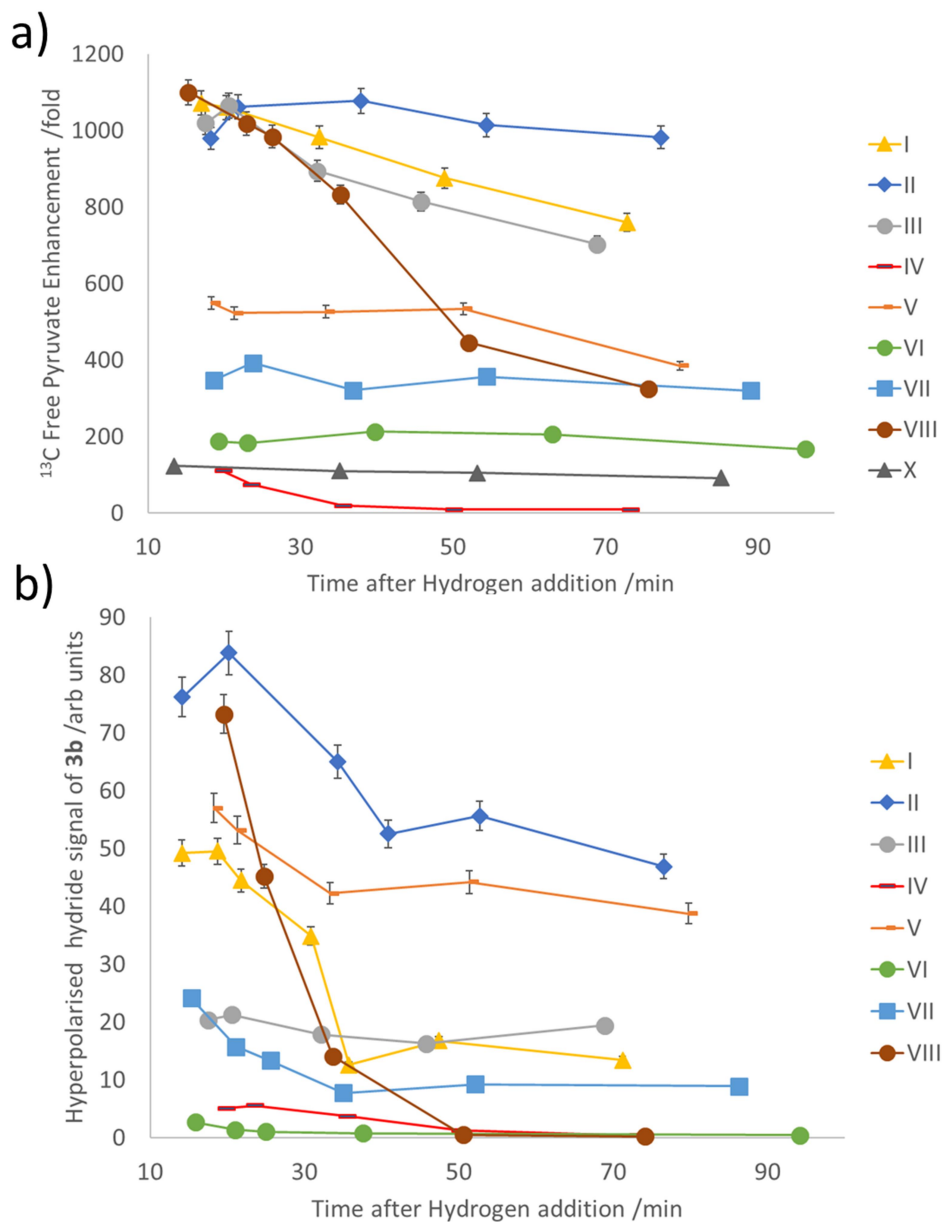

Figure S27: Results after shaking a sample of  $[\text{IrCl}(\text{COD})(\text{IMes})]$ , 6 equivalents of sodium pyruvate-1,2- $^{13}\text{C}_2$ , and 4 equivalents of the specified sulfoxide I-X in 0.6 mL methanol- $d_4$  with 3 bar p- $\text{H}_2$  a) averaged  $^{13}\text{C}_2$  pyruvate enhancement and b) hyperpolarised  $^1\text{H}$  3b hydride signal intensities monitored over the first 90 minutes of reaction following initial  $\text{H}_2$  addition.

## SUPPORTING INFORMATION

The concentration of methylphenylsulfoxide **II** was varied to determine its effect on pyruvate enhancement. The relative  $^{13}\text{C}$  NMR signal gains for bound and free pyruvate, in addition to the hydride ligand signal enhancements for its **3b** derivative across a range of concentrations, are presented in Figure 3

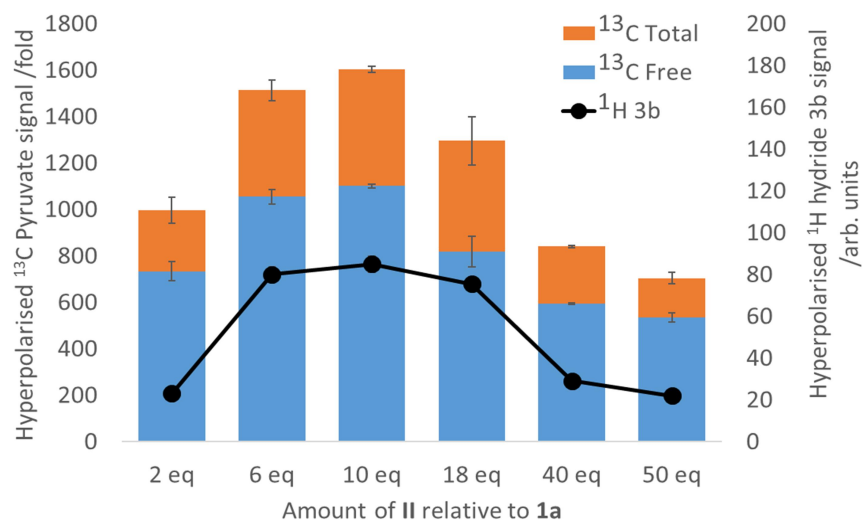

**Figure S28:** Averaged hyperpolarised  $^{13}\text{C}$  pyruvate (left axis, bars) and  $^1\text{H}$  hydride signals of **3b** derivative (right axis, line) detected as a function of sulfoxide concentration after a methanol- $d_4$  solution of **1a**, 6 equivalents of sodium pyruvate-1,2- $[^{13}\text{C}_2]$  and the indicated equivalents of **II** are shaken with 3 bar  $p\text{-H}_2$  for 10 seconds in a mu metal shield.

## S2.2: Effect of changing the chloride concentration

Solutions of 2 mg **1a**, 10 equivalents of sulfoxide **I** and 5 equivalents of sodium pyruvate-1,2- $^{13}\text{C}_2$  in 0.6 mL methanol- $d_4$  containing 0, 1, 3 or 5 equivalents of NaCl in 5  $\mu\text{L}$  of  $\text{D}_2\text{O}$  were prepared. These four solutions were activated with 3 bar  $\text{H}_2$  and their  $^{13}\text{C}_2$  pyruvate enhancement monitored as a function of reaction time. Signal enhancements for this data were calculated by reference to a thermal 128 scan  $^{13}\text{C}$  NMR spectrum of the same sample and were consistent with those calculated by reference to a more concentrated sodium pyruvate-1,2- $^{13}\text{C}_2$  thermal sample as outlined in Shchepin *et al.*<sup>6</sup>

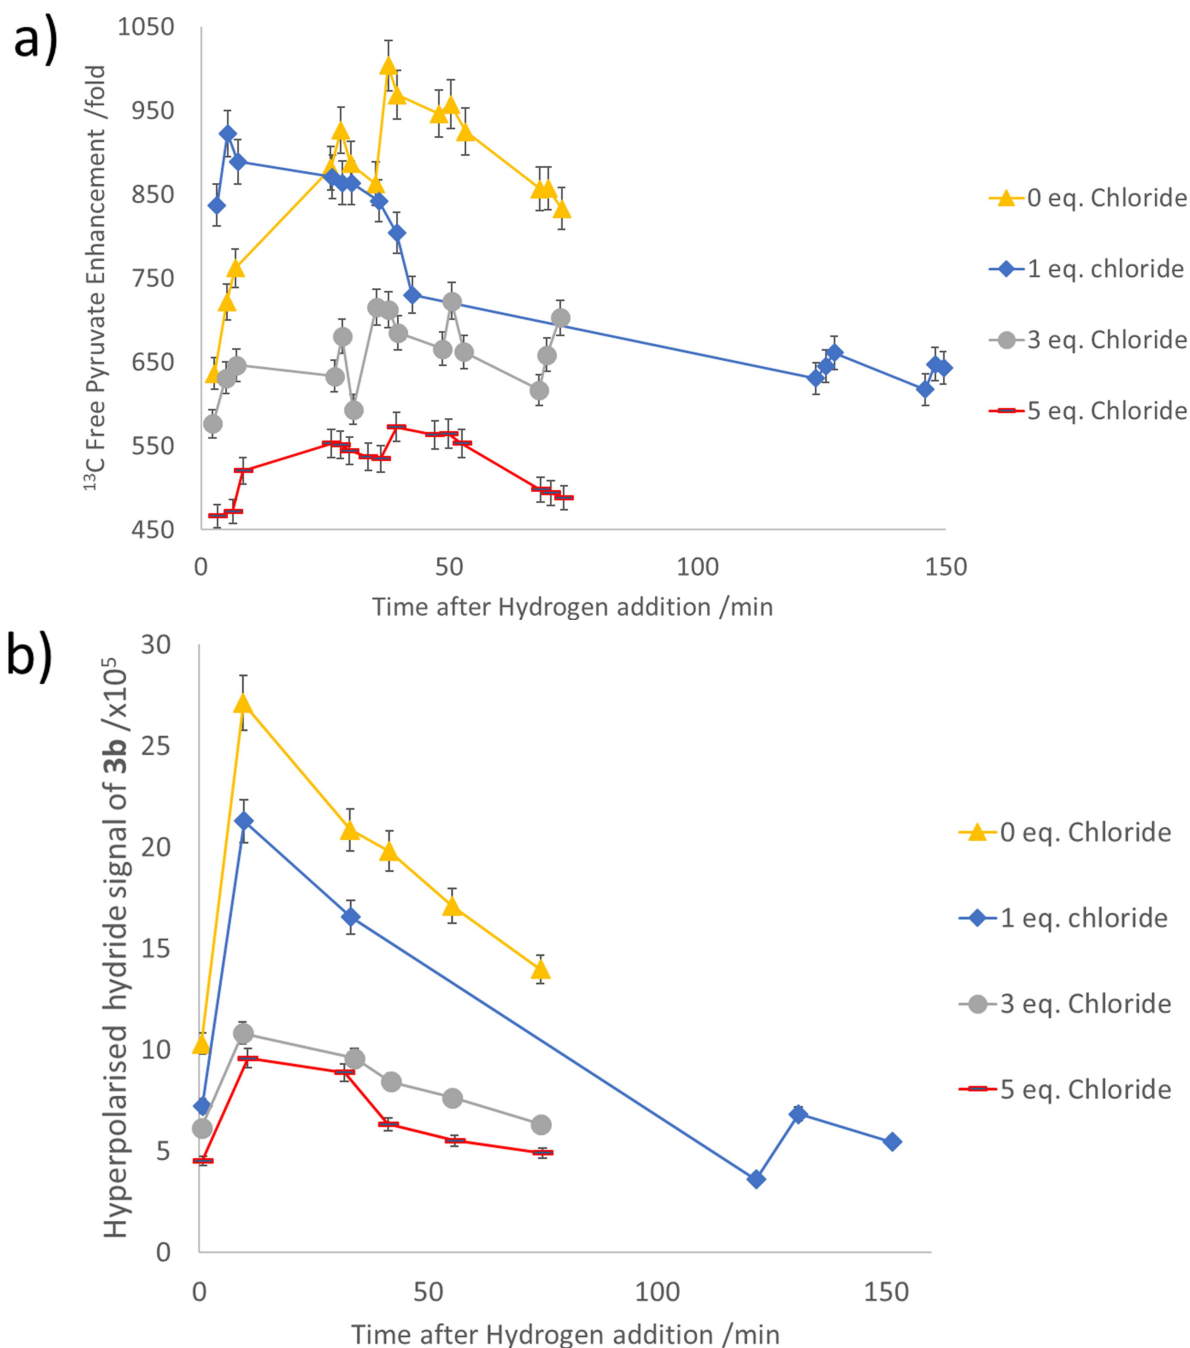

Figure S29: Upon shaking a sample of  $[\text{IrCl}(\text{COD})(\text{IMes})]$ , 5 equivalents of sodium pyruvate-1,2- $^{13}\text{C}_2$ , and 10 equivalents of DMSO with varying amounts of NaCl in 0.6 mL methanol- $d_4$  with 3 bar p- $\text{H}_2$  the size of the a) average  $^{13}\text{C}_2$  pyruvate enhancement and b) hyperpolarised  $^1\text{H}$  **3b** hydride signal intensities were monitored following initial  $\text{H}_2$  addition.

## S2.3: Effect of changing the carbene ligand

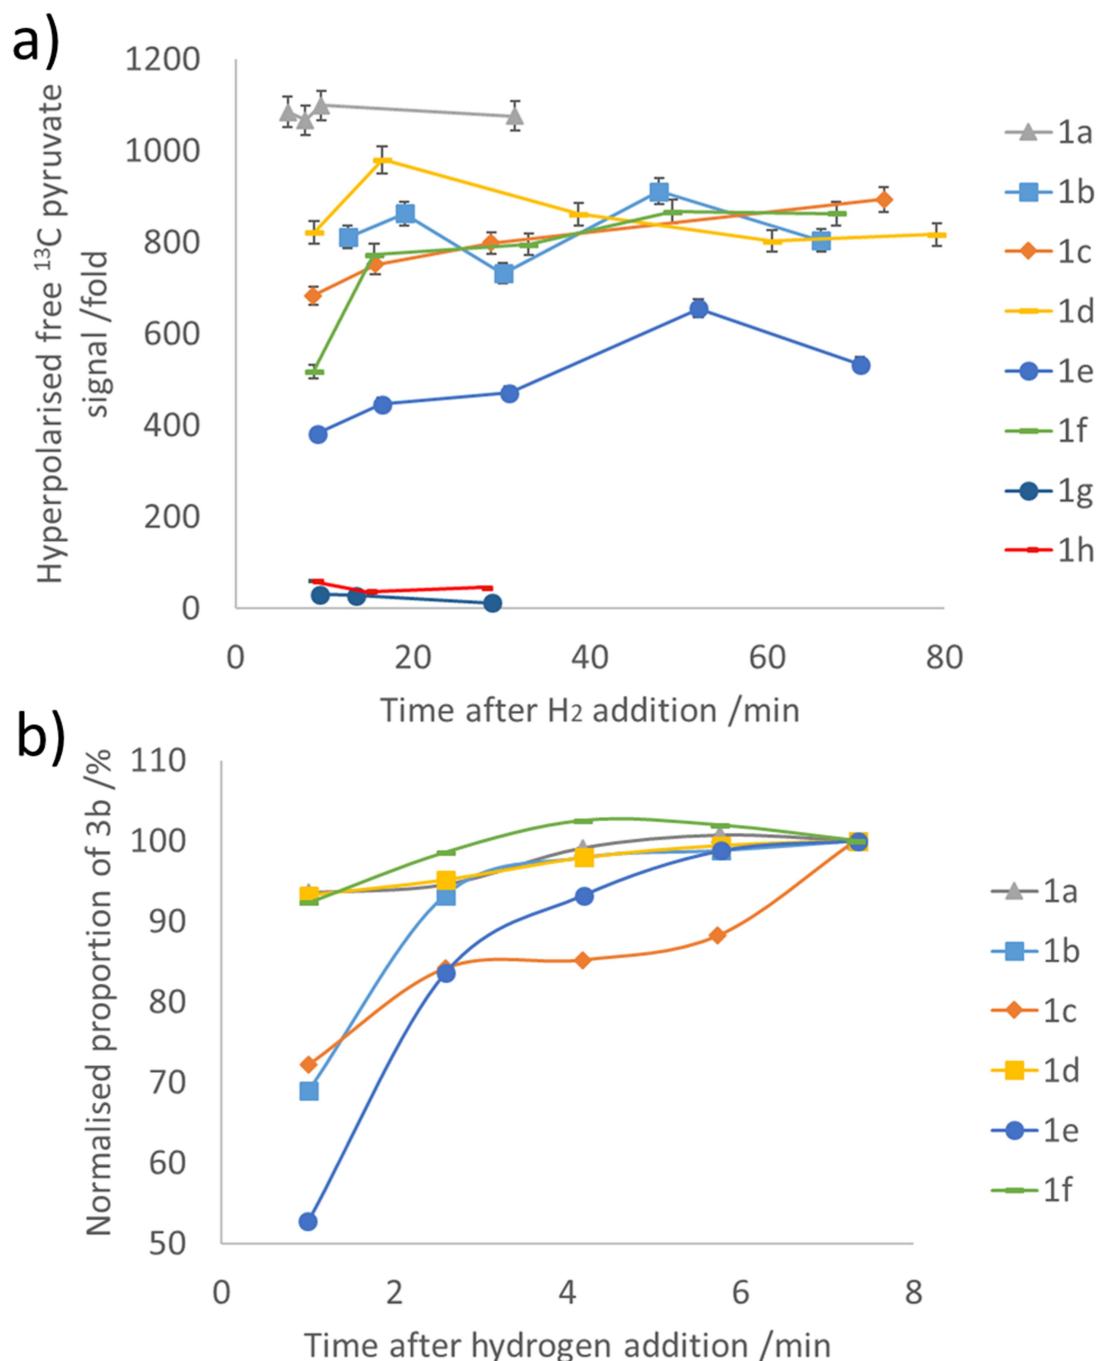

Figure S30 a) Average hyperpolarised  $^{13}\text{C}_2$  pyruvate responses and b) proportion of 3b relative to all other hydride containing species when a sample of the iridium precatalyst 1a-h, 6 equivalents of sodium pyruvate-1,2- $^{13}\text{C}_2$ , and 4 equivalents of methylphenylsulfoxide is shaken in 0.6 mL methanol- $d_4$  with 3 bar  $p\text{-H}_2$  for 10 seconds in a mu metal shield and then monitored periodically after this point.

### S3. Hyperpolarised $^{13}\text{C}$ and $^1\text{H}$ NMR spectra

#### S3.1: Typical hyperpolarised $^{13}\text{C}$ and $^1\text{H}$ NMR spectra

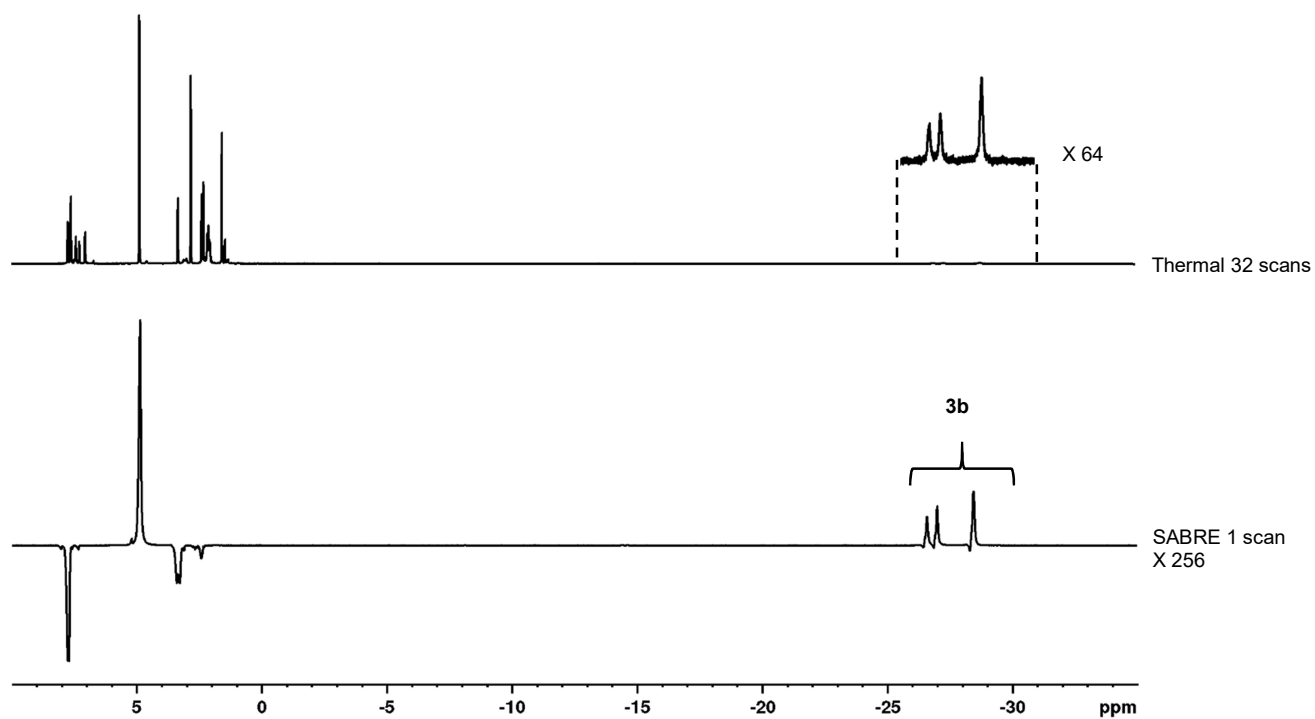

Figure S31: Hyperpolarised 1 scan  $^1\text{H}$  NMR spectrum recorded at 298 K (below) resulting from shaking a sample of  $[\text{IrCl}(\text{COD})(\text{IMes})]$ , sodium pyruvate-1,2- $^{13}\text{C}_2$  and phenylmethylsulfoxide in methanol- $\text{d}_4$  with 3 bar  $\text{p-H}_2$  for 10 seconds at 65 G with the corresponding thermal measurement (32 scans) displayed above.

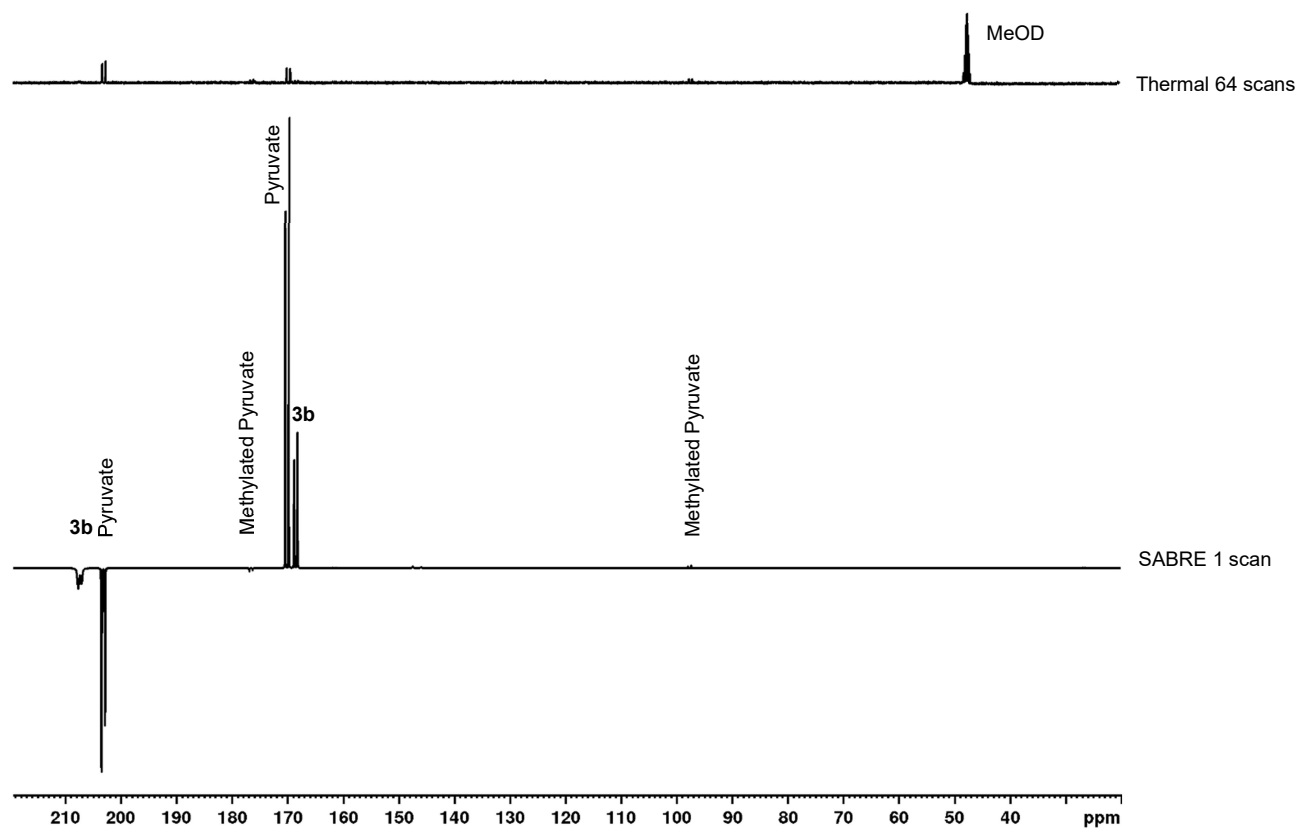

Figure S32: Hyperpolarised 1 scan  $^{13}\text{C}$  NMR spectrum recorded at 298 K resulting from shaking a sample of  $[\text{IrCl}(\text{COD})(\text{IMes})]$ , sodium pyruvate-1,2- $^{13}\text{C}_2$  and phenylmethylsulfoxide in methanol- $d_4$  with 3 bar  $p\text{-H}_2$  for 10 seconds in a mu metal shield 65 G with the corresponding thermal measurement (64 scans) displayed above.

### S3.2: Hyperpolarised $^{13}\text{C}$ and $^1\text{H}$ spectra using sulfoxide IX

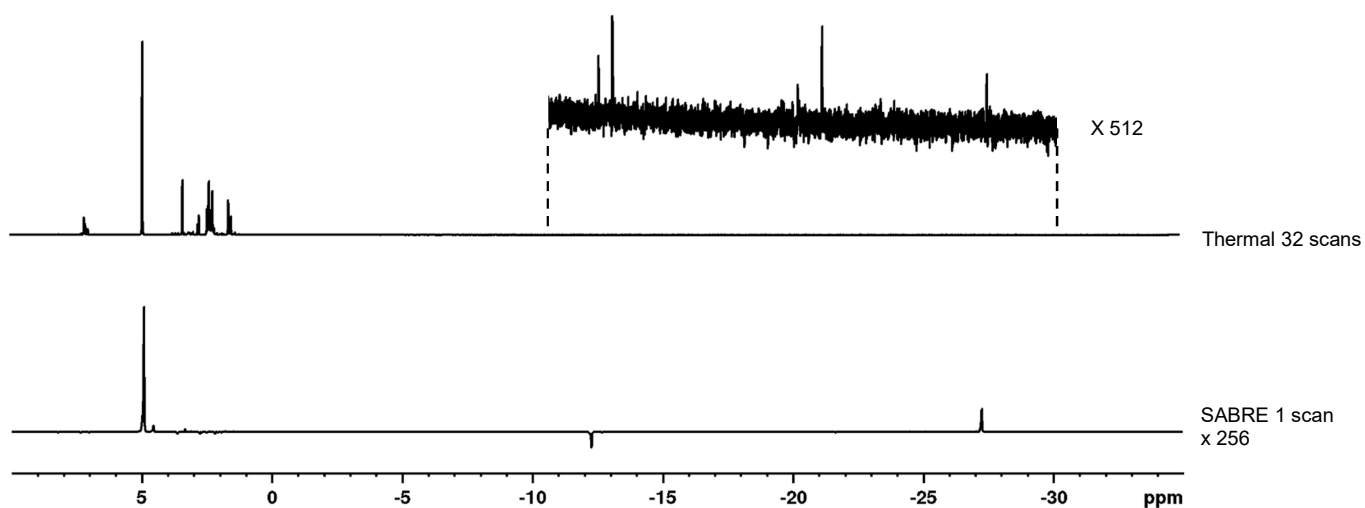

Figure S33: Hyperpolarised 1 scan  $^1\text{H}$  NMR spectrum recorded at 298 K (below) resulting from shaking a sample of  $[\text{IrCl}(\text{COD})(\text{IMes})]$ , sodium pyruvate-1,2- $^{13}\text{C}_2$  and sulfoxide IX in methanol- $d_4$  with 3 bar  $p\text{-H}_2$  for 10 seconds at 65 G with the corresponding thermal measurement (64 scans) displayed above.

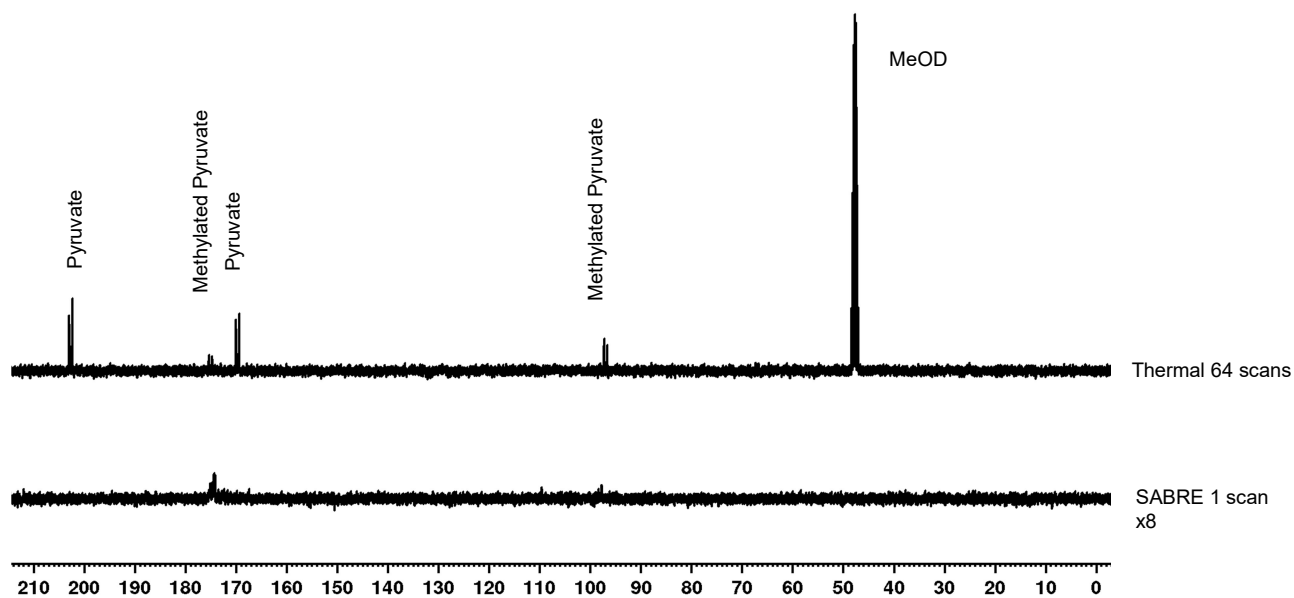

Figure S34: Hyperpolarised 1 scan  $^{13}\text{C}$  NMR spectrum recorded at 298 K (below) resulting from shaking a sample of  $[\text{IrCl}(\text{COD})(\text{IMes})]$ , sodium pyruvate-1,2- $^{13}\text{C}_2$  and sulfoxide IX in methanol- $d_4$  with 3 bar  $p\text{-H}_2$  for 10 seconds in a mu metal shield with the corresponding thermal measurement (64 scans) displayed above.

### S3.3: Hyperpolarised $^{13}\text{C}$ and $^1\text{H}$ spectra using sulfoxide X

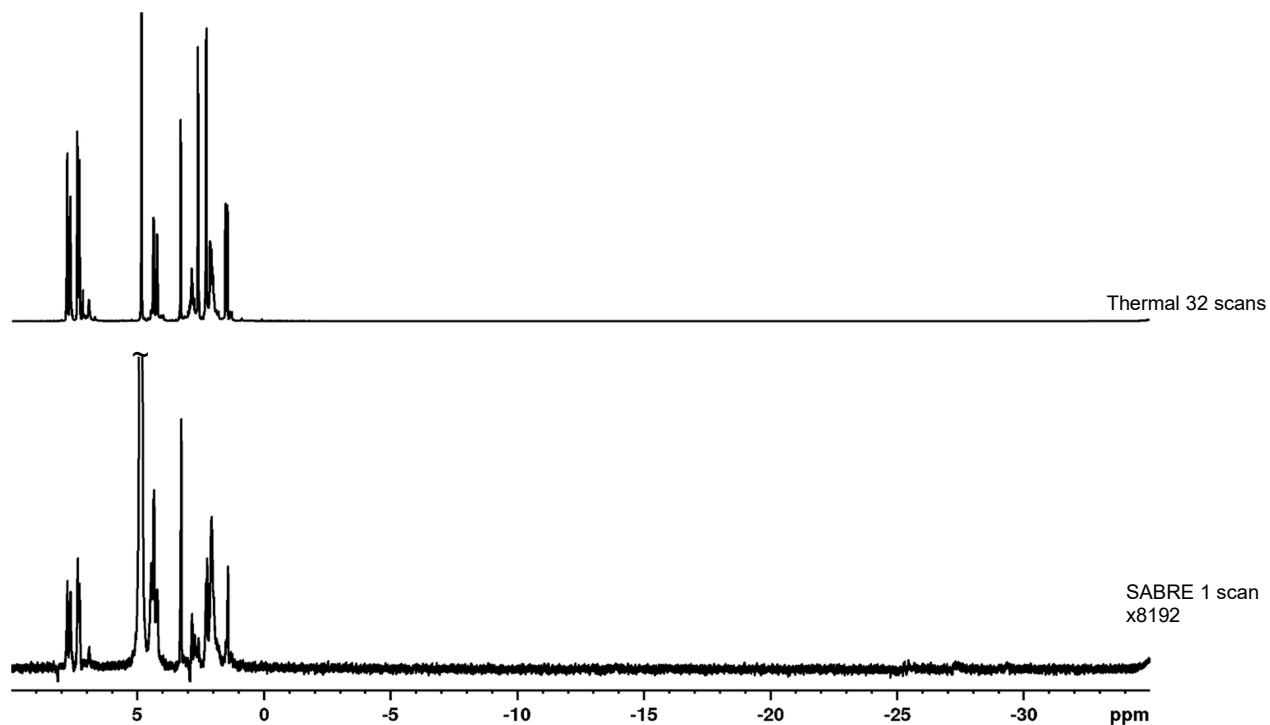

Figure S35: Hyperpolarised 1 scan  $^1\text{H}$  NMR spectrum recorded at 298 K (below) resulting from shaking a sample of  $[\text{IrCl}(\text{COD})(\text{IMes})]$ , sodium pyruvate-1,2- $^{13}\text{C}_2$  and sulfoxide X in methanol- $d_4$  with 3 bar  $p\text{-H}_2$  for 10 seconds at 65 G with the corresponding thermal measurement (64 scans) displayed above.



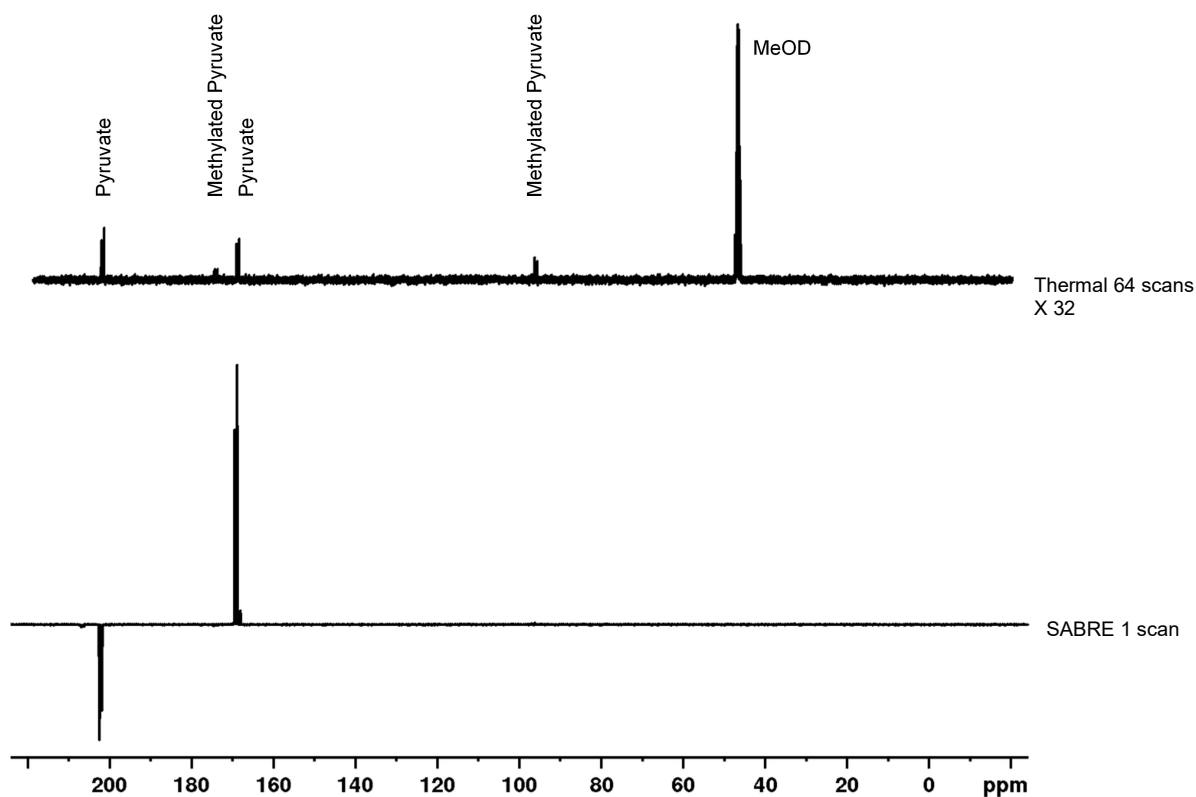

Figure S36: Hyperpolarised 1 scan  $^{13}\text{C}$  NMR spectrum recorded at 298 K (below) resulting from shaking a sample of  $[\text{IrCl}(\text{COD})(\text{IMes})]$ , sodium pyruvate-1,2- $^{13}\text{C}_2$  and sulfoxide X in methanol- $d_4$  with 3 bar  $p\text{-H}_2$  for 10 seconds in a mu metal shield with the corresponding thermal measurement (64 scans) displayed above.

## S4. Optimisation of $^{13}\text{C}_2$ Pyruvate signal enhancement

### S4.1: Effect of shaking time and $p\text{-H}_2$ pressure

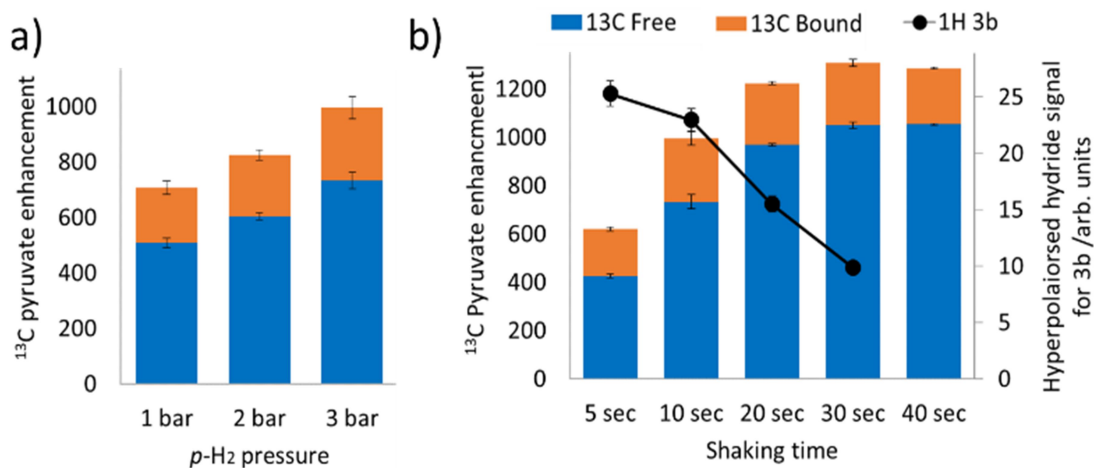

Figure S37: a) Average hyperpolarised  $^{13}\text{C}$  pyruvate signal enhancement as a function of hydrogen pressure (1a with 2 eq phenylmethylsulfoxide, 3 bar  $p\text{-H}_2$  and 10 second shaking). Hyperpolarised b)  $^{13}\text{C}$  pyruvate and  $^1\text{H}$  hydride responses seen for 3b as a function of shaking time recorded on the same sample (3 bar).

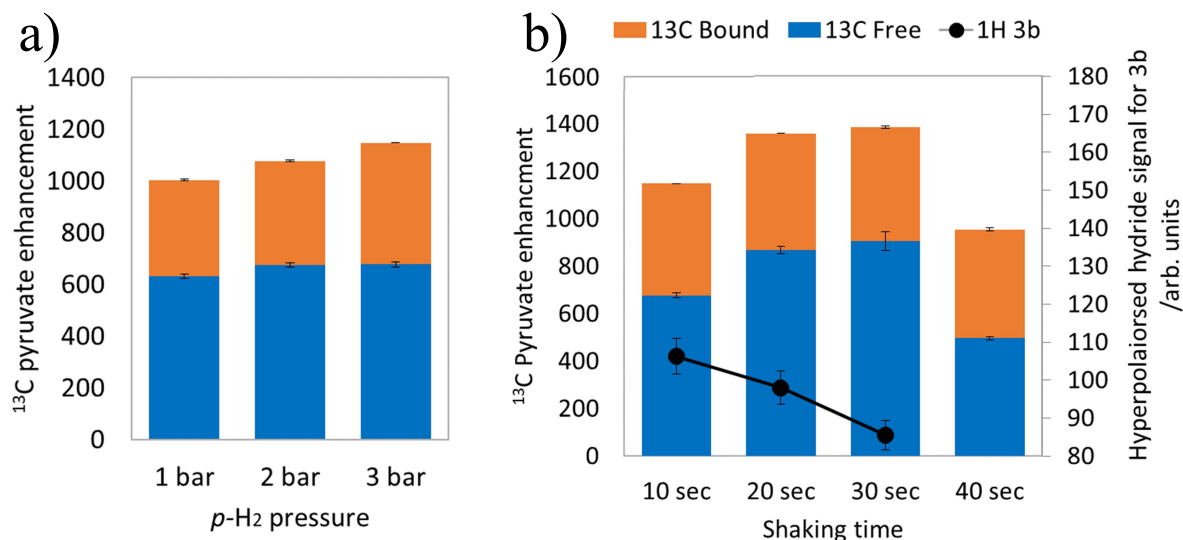

Figure S38: a) Average hyperpolarised <sup>13</sup>C pyruvate signal enhancement as a function of hydrogen pressure (1a-d<sub>24</sub> with 10 eq phenylmethylsulfoxide, 3 bar p-H<sub>2</sub> and 10 second shaking). Hyperpolarised b) <sup>13</sup>C pyruvate and <sup>1</sup>H hydride responses seen for 3b as a function of shaking time recorded on the same sample (3 bar).

#### S4.2: Effect of pyruvate concentration

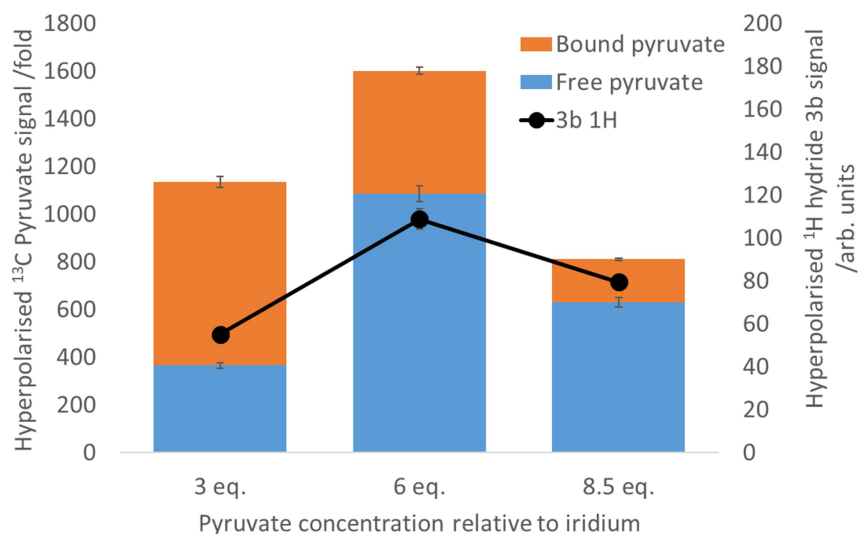

Figure S39: Average hyperpolarised <sup>13</sup>C pyruvate signal enhancement and hyperpolarised hydride signal intensity of 3b as a function of pyruvate concentration relative to iridium for a sample containing 1a with 10 eq phenylmethylsulfoxide and 3 bar p-H<sub>2</sub> after 10 seconds of shaking.

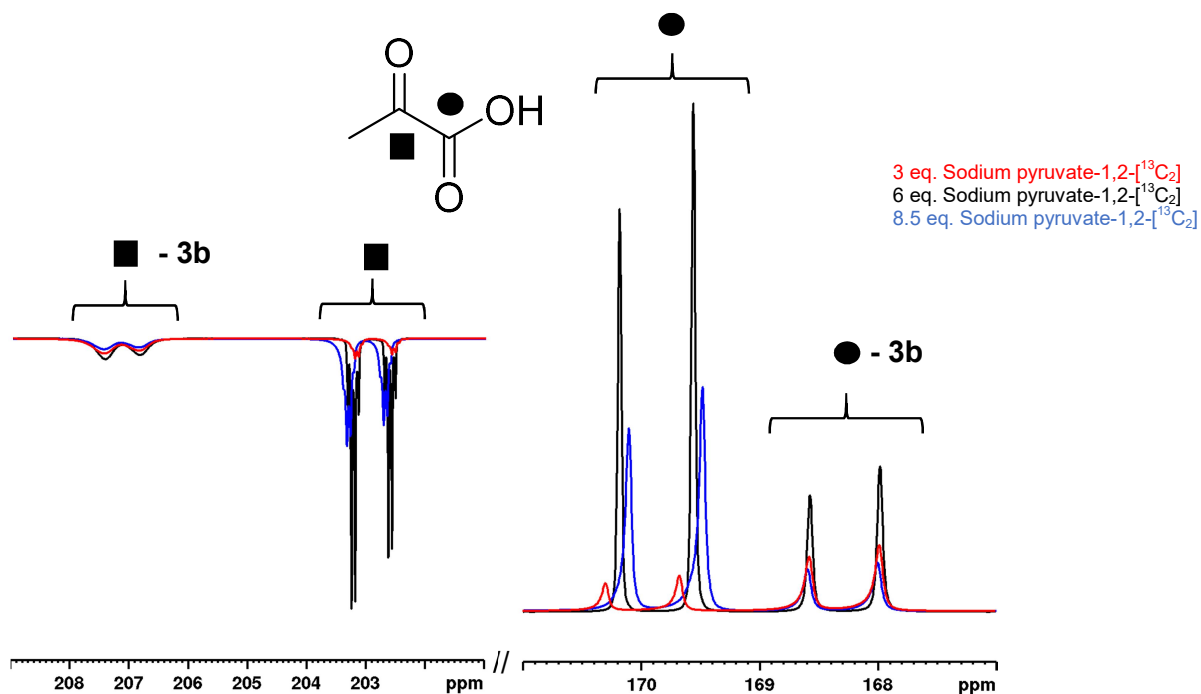

Figure S40: Partial  $^{13}\text{C}$  hyperpolarised NMR spectra resulting from shaking a sample of  $[\text{IrCl}(\text{COD})(\text{IMes})]$  with the indicated equivalents of sodium pyruvate-1,2- $^{13}\text{C}_2$  and 10 equivalents of methylphenylsulfoxide in methanol- $d_4$  with 3 bar  $p\text{-H}_2$  for 10 seconds in a mu metal shield at similar time points after the initial  $\text{H}_2$  addition step.

## S5. References

1. L. D. Vazquez-Serrano, B. T. Owens and J. M. Buriak, *Inorg. Chim. Acta*, 2006, **359**, 2786-2797.
2. CrysAlisPro, *Oxford Diffraction Ltd.*, Version 1.171.34.41.
3. O. V. Dolomanov, L. J. Bourhis, R. J. Gildea, J. A. Howard and H. Puschmann, *J. Appl. Cryst.*, 2009, **42**, 339-341.
4. G. Sheldrick, *Acta Cryst. Sec. A.*, 2015, **71**, 3-8.
5. G. Sheldrick, *Acta Cryst. Sec. C.*, 2015, **71**, 3-8.
6. R. V. Shchepin, L. Jaigirdar, T. Theis, W. S. Warren, B. M. Goodson and E. Y. Chekmenev, *J. Phys. Chem. C*, 2017, **121**, 28425-28434.
